# Supplementary material for: Single-nucleotide polymorphism identification and genotyping in Camelina sativa
Source: PubMed Central journal article supplement (PMC4300397; doi:10.1007/s11032-015-0224-6), 2015-01-21

**Supplementary Figure S1:** Plot of genetic map position (cM) on x-axis against physical map position (Mb) on the y-axis for each SNP marker on the *C. sativa* genetic map.

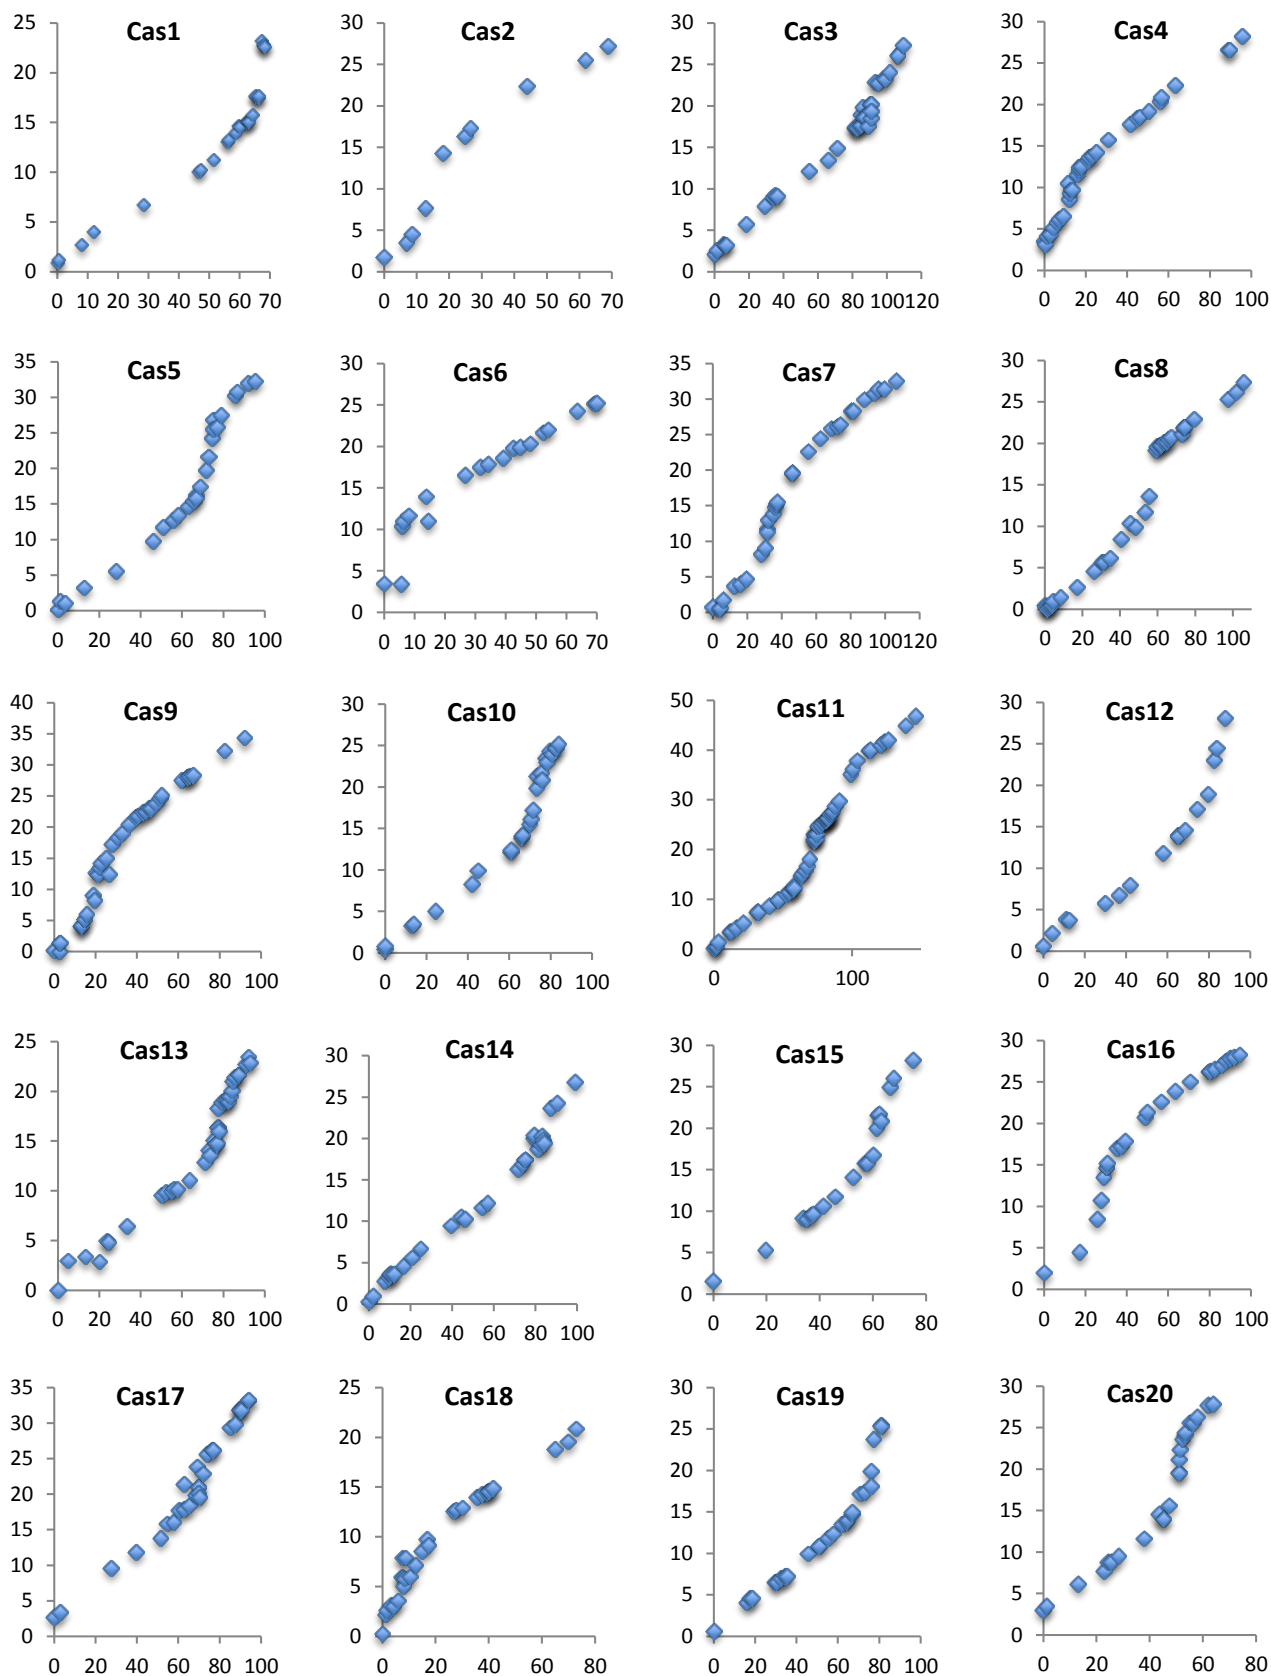

**Supplementary Figure S2:** Population structure analysis of 175 *C. sativa* accessions by STRUCTURE. (a) Estimated LnP(D) of possible clusters (k) from 1 to 10; (b) Evanno's  $\Delta k$  based on the rate of change of LnP(D) between successive k.

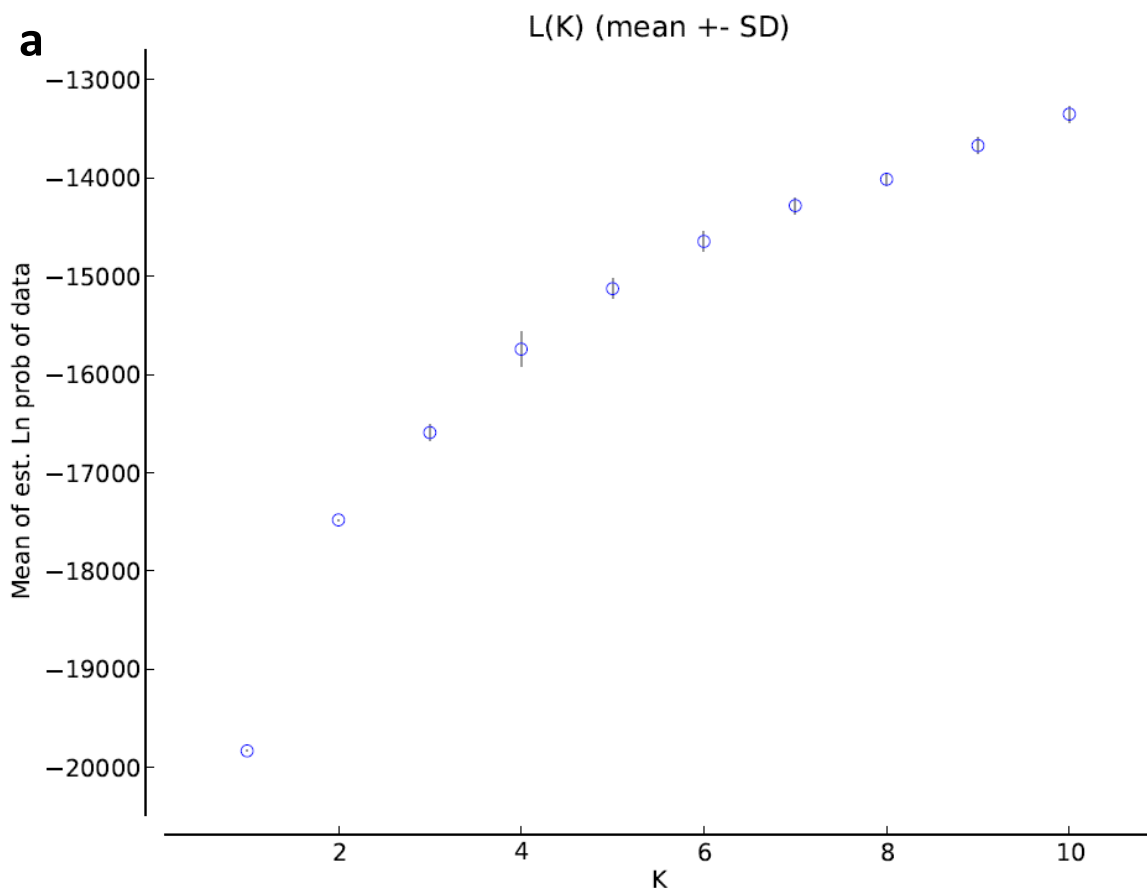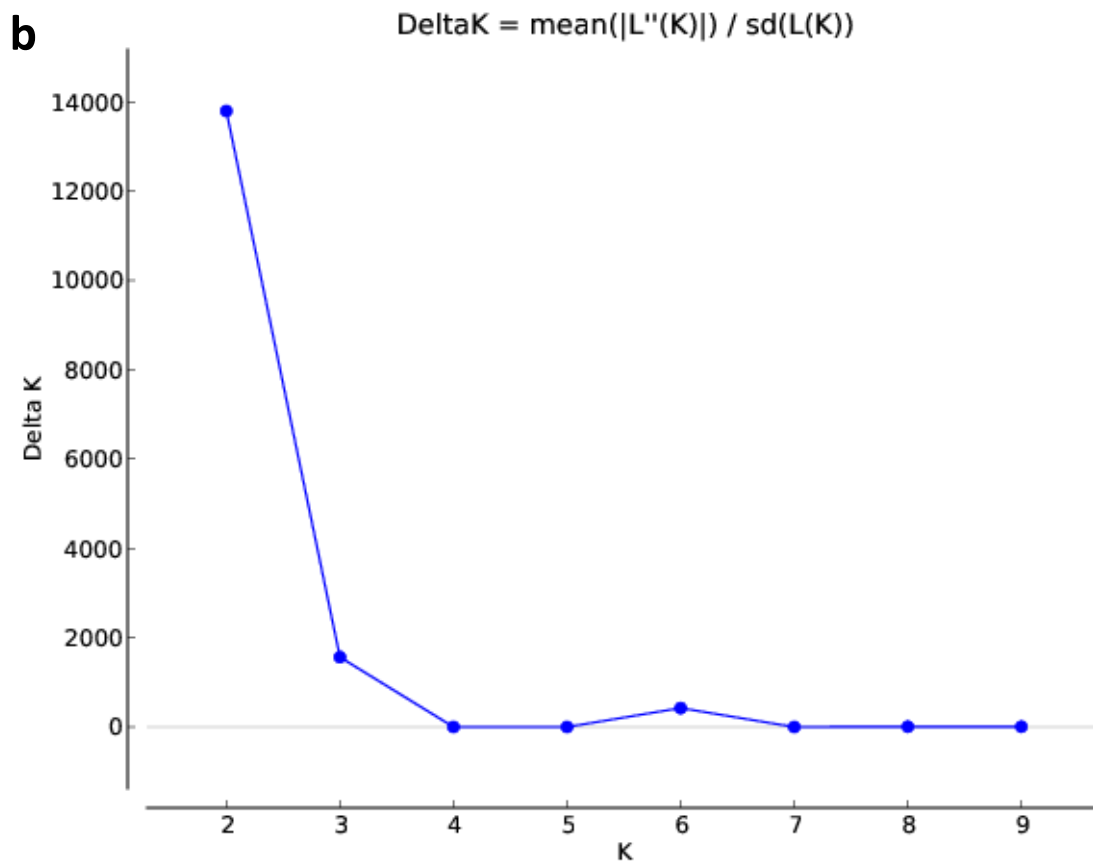

**Supplementary Figure S3:** Distribution of PIC values along the *C. sativa* linkage groups in the sub-populations K1, K2 and admixture groups along with whole collection of *C. sativa* accessions.

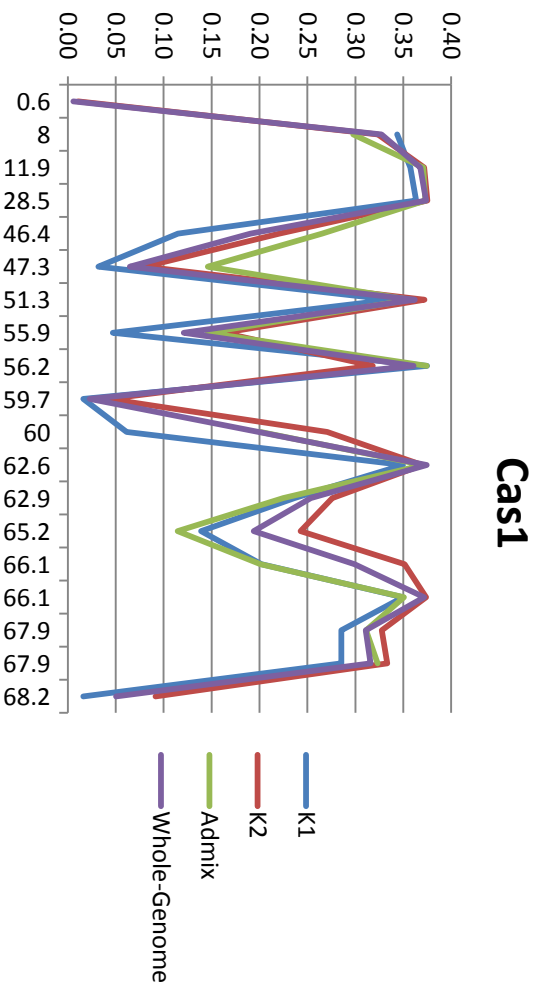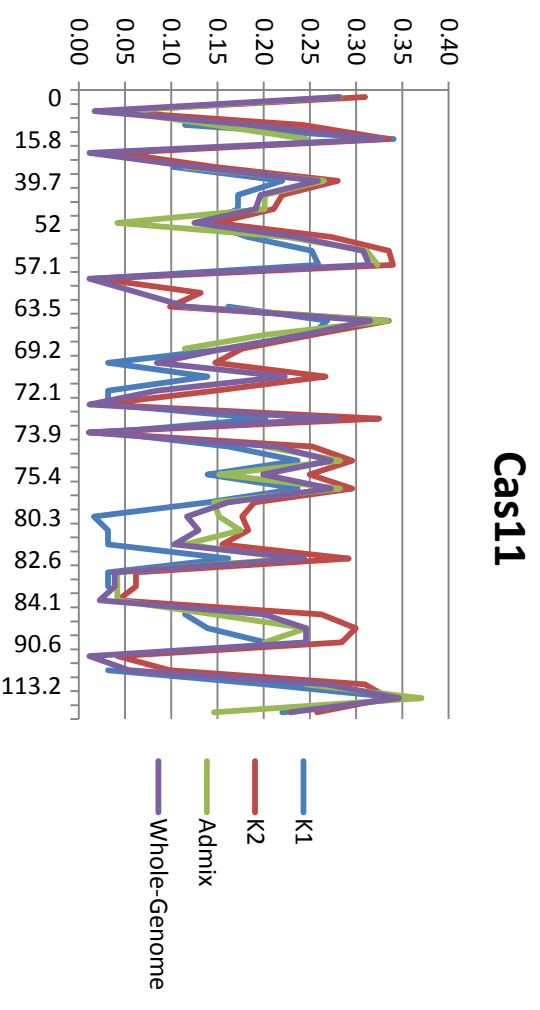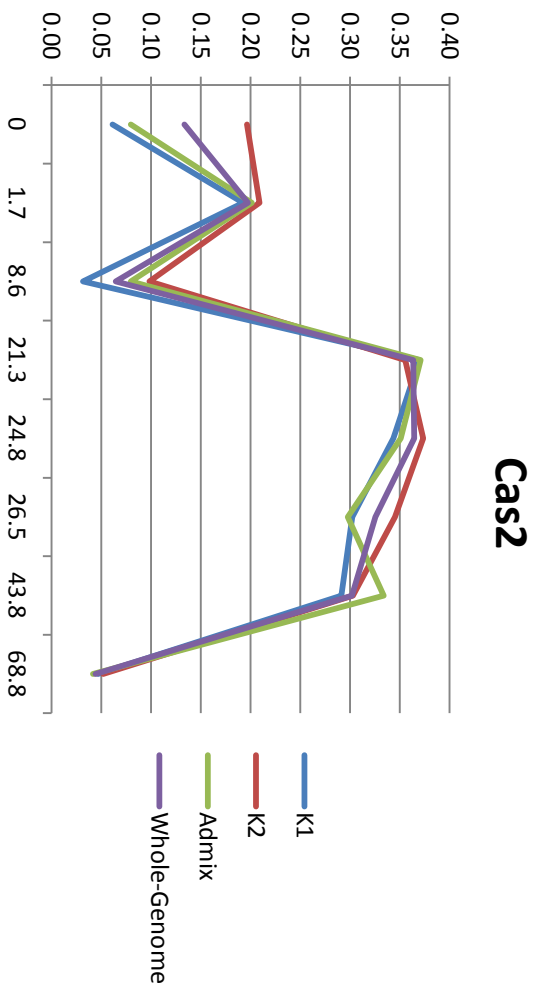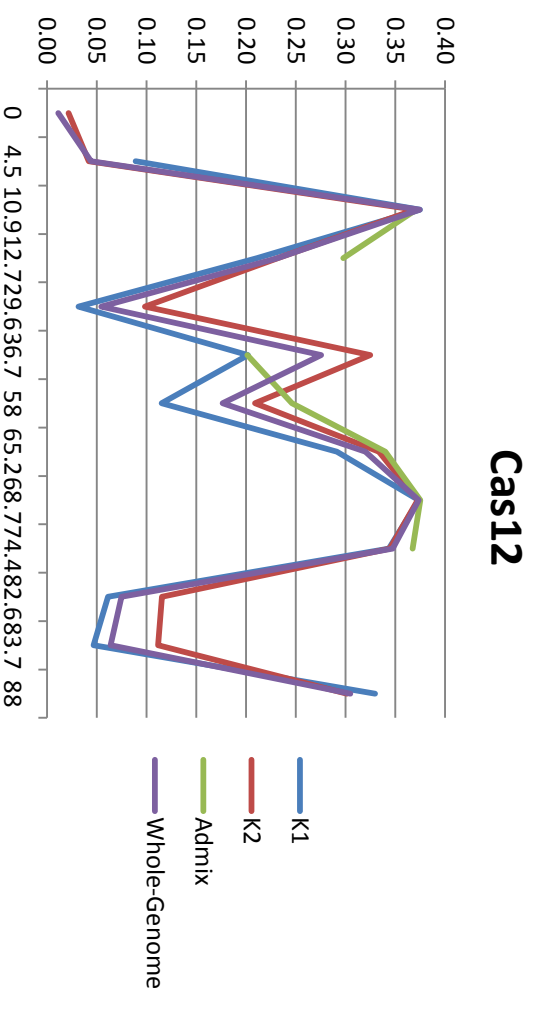

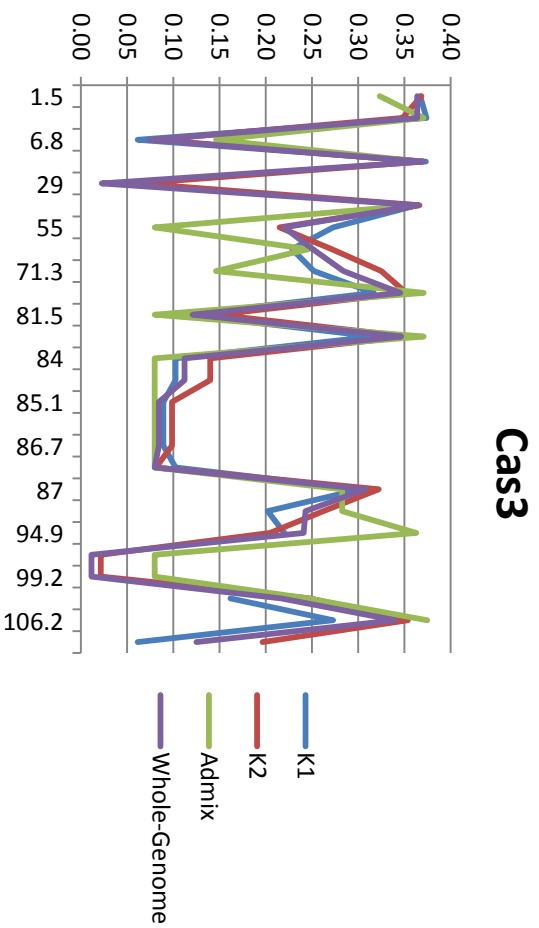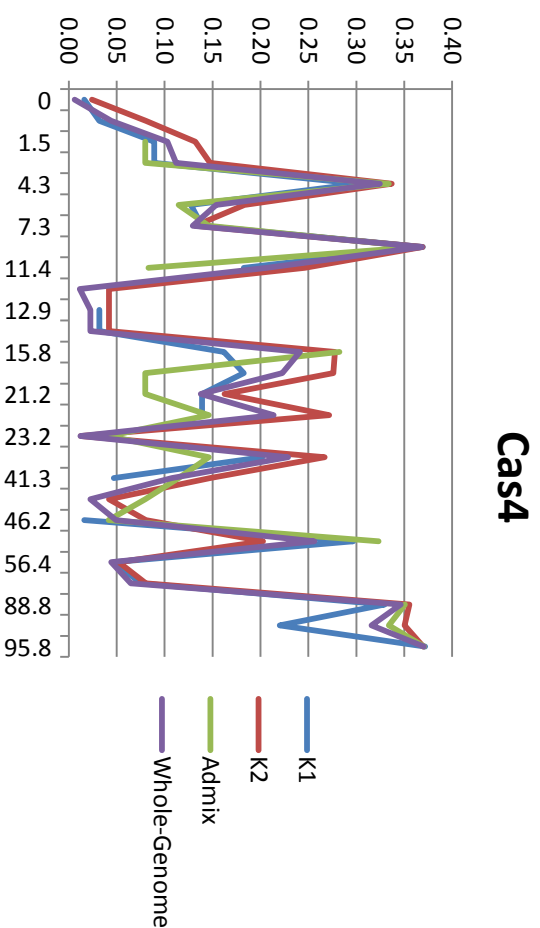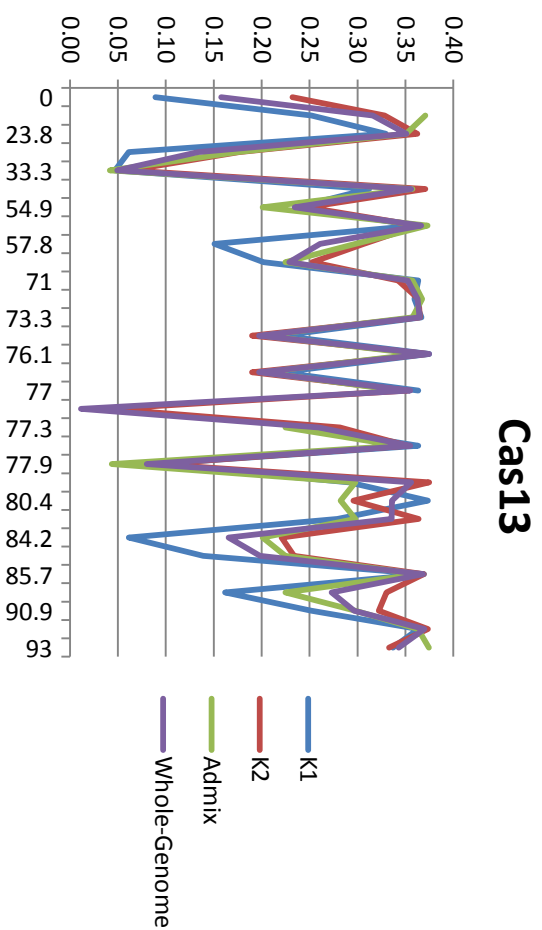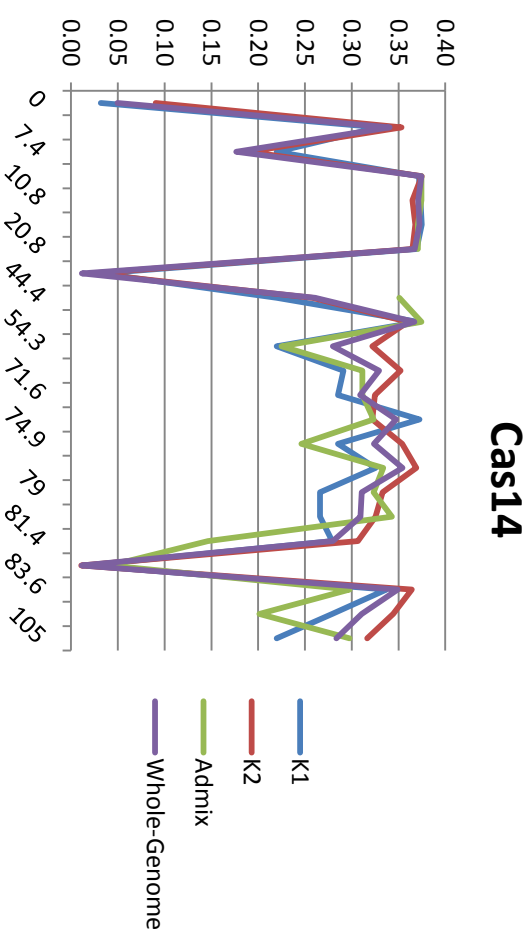

### Cas5

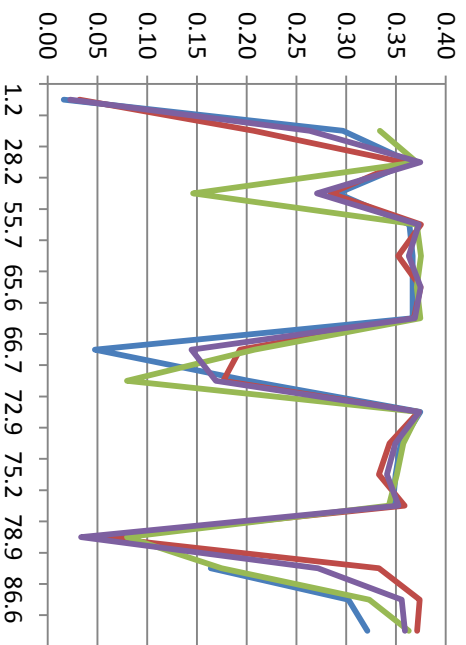

K1  
K2  
Admix  
Whole-Genome

### Cas15

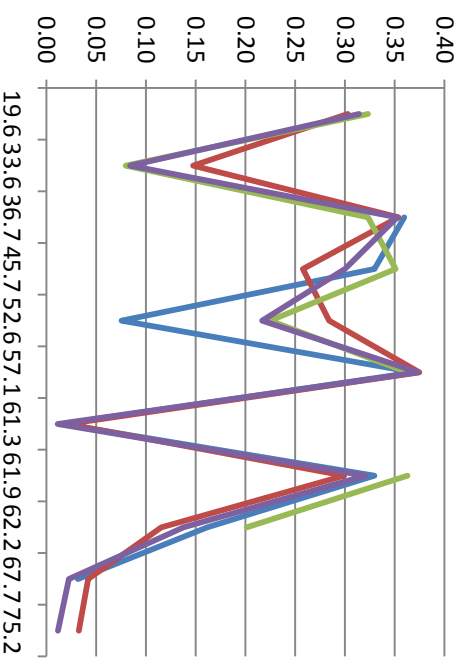

K1  
K2  
Admix  
Whole-Genome

### Cas6

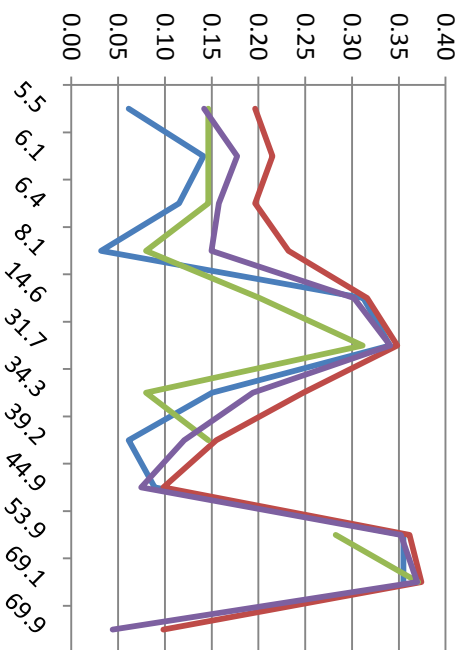

K1  
K2  
Admix  
Whole-Genome

### Cas16

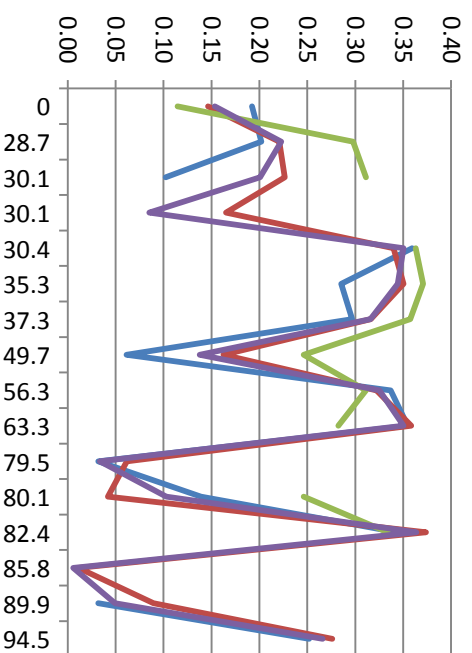

K1  
K2  
Admix  
Whole-Genome

### Cas7

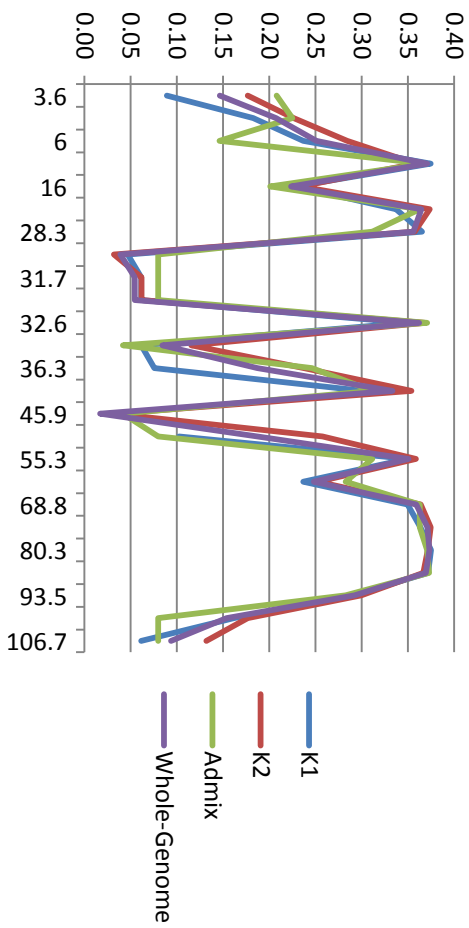

### Cas17

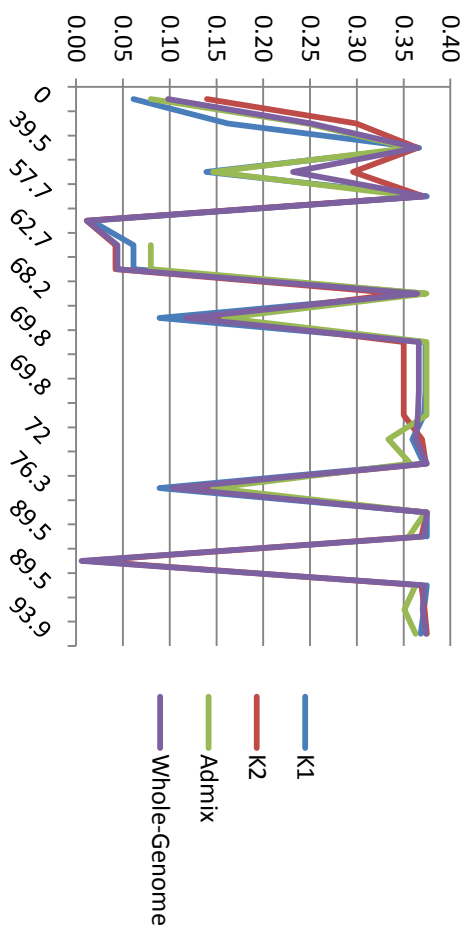

### Cas8

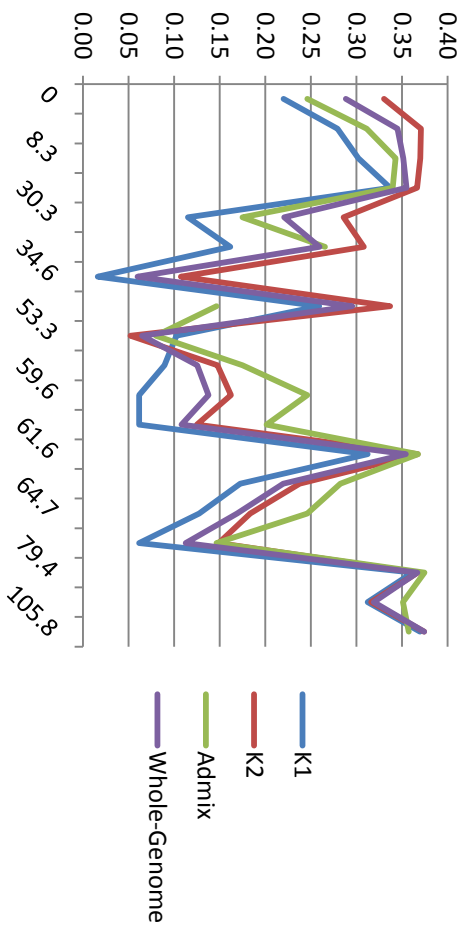

### Cas18

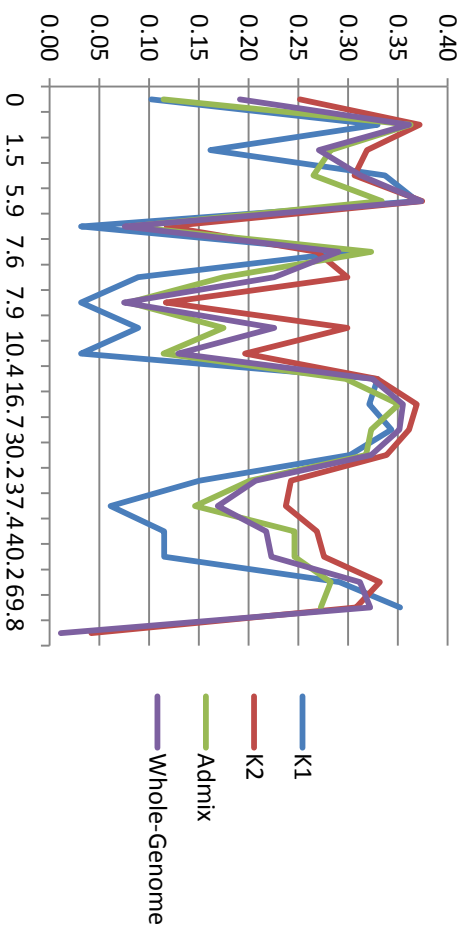

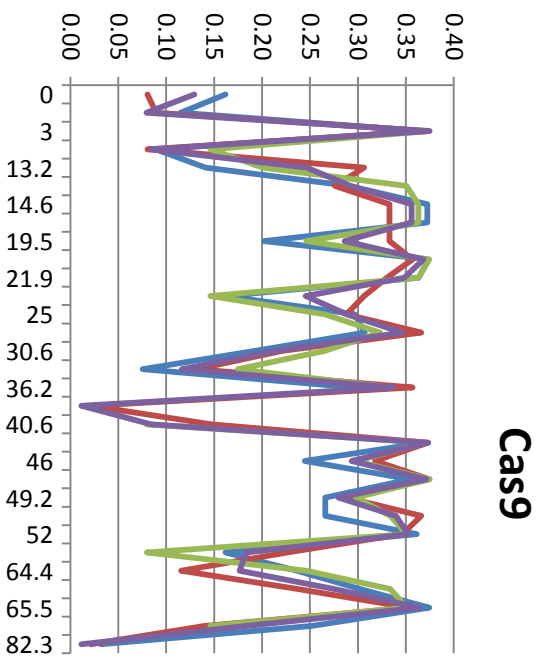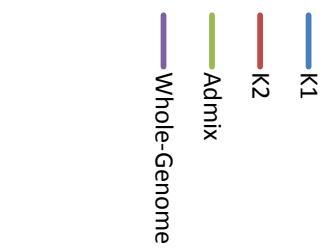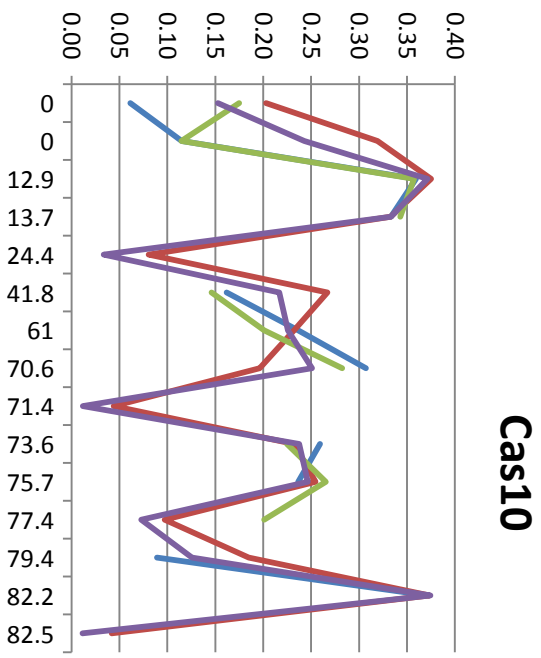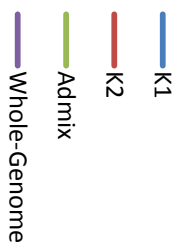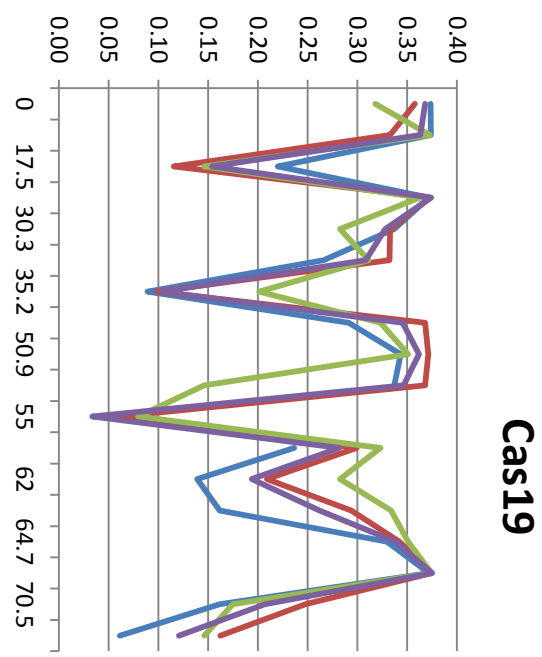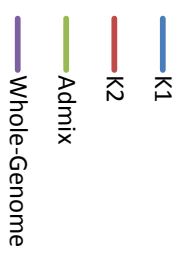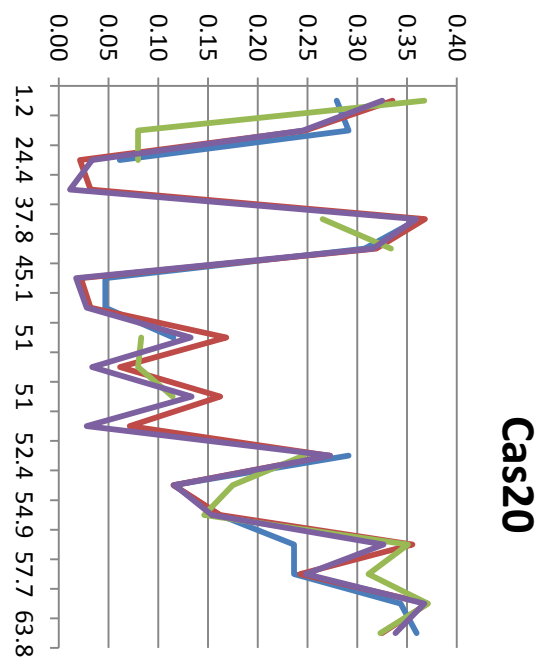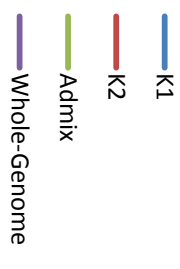

Supplement: 11032_2015_224_MOESM2_ESM.pdf [file 11032_2015_224_MOESM2_ESM.pdf]
